# Supplementary material for: Cell-permeable transgelin-2 as a potent therapeutic for dendritic cell-based cancer immunotherapy
Source: Springer Nature journal article supplement (doi:10.1186/s13045-021-01058-6), 2021-03-17

Figure S1. *Tagln2*-knockout cDCs do not optimally control tumor growth in mice

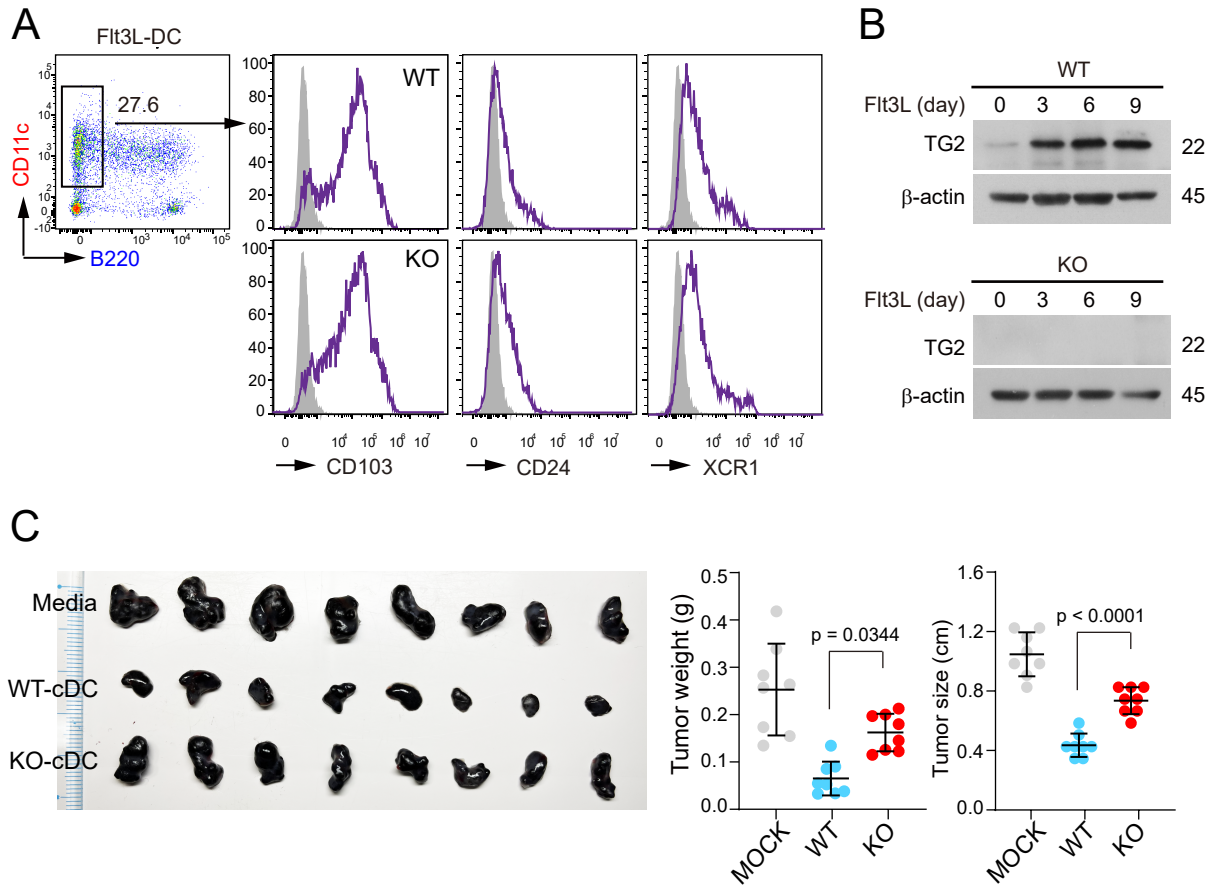

Figure S2. Recombinant dU-TG2P potentiated cDC functions *in vitro*

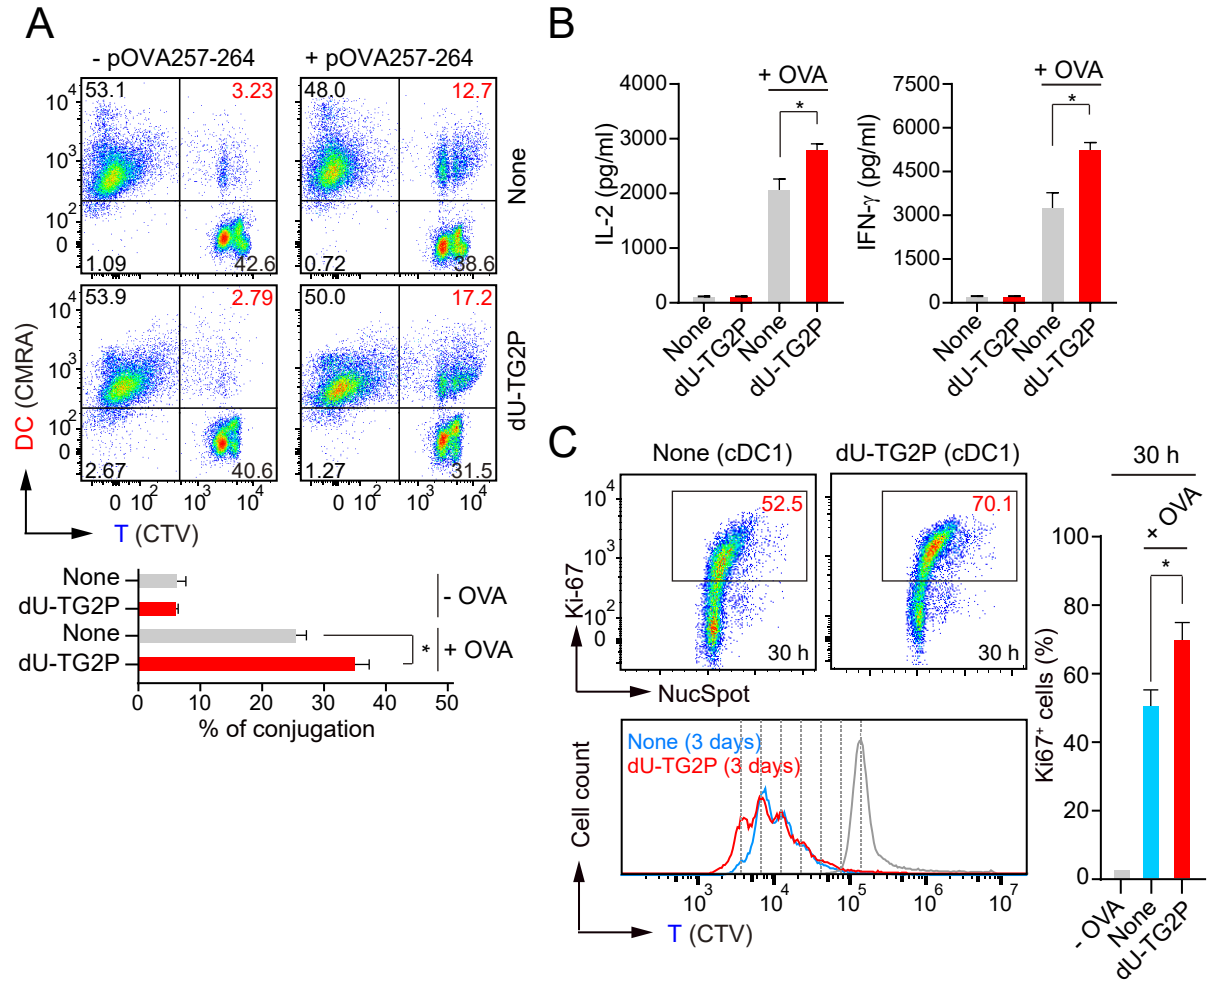

Supplement: MOESM1 [file 18976544]
